# Supplementary material for: Predictors Associated with Health-Related Heat Risk Perception of Urban Citizens in Germany
Source: MDPI journal article supplement (doi:10.3390/ijerph17030874), 2020-01-30
Supplement: s1 [file s1]

## Supplementary Material S2

For reproduction purposes, and for a better relation to the survey elements, the statements used in the questionnaires have been translated into English and can be found in this document.

Table S1 Statements about risk perception

| Item No. | Statement <sup>a</sup>                                                       |
|----------|------------------------------------------------------------------------------|
| 1        | I feel my health is threatened by the increasing pollution of drinking water |
| 2        | Animals and plants are endangered due to water pollution                     |
| 3        | I think that heat waves endanger my health                                   |
| 4        | Heat waves threaten plants and animals                                       |
| 5        | I am afraid that I become sick by air pollution                              |
| 6        | Air pollution is a serious threat to plants and animals                      |
| 7        | The greenhouse effect probably has bad consequences for myself.              |
| 8        | The greenhouse effect puts plants and animals to danger.                     |

<sup>a</sup> = Four-level response scale: I agree; I agree to a large extent; I partly agree; I do not agree.

Table S2 Knowledge about heat waves

| Item No. | Statement <sup>a</sup>                                                                 |
|----------|----------------------------------------------------------------------------------------|
| 1        | Older and very young people are particularly vulnerable during a heat wave.            |
| 2        | Excessive sweating during a heat wave may be a sign of heat stress.                    |
| 3        | People with a cardiac disease are in danger of becoming sick during a heat wave.       |
| 4        | Heat-related diseases can lead to death.                                               |
| 5        | There is no such evidence for heat waves to cause respiratory diseases.                |
| 6        | Diabetes is an example for a heat-related disease.                                     |
| 7        | Heat waves foster the development of harmful bacteria in water and food.               |
| 8        | Heat waves can be a factor for depression and anxiety.                                 |
| 9        | Due to the building's shade, heat waves are less common in cities than in rural areas. |
| 10       | Heat stress during nighttime is worse than heat stress during daytime.                 |

<sup>a</sup> = Response selection: true; false; I don't know.

Table S3 Internal and external locus of control

| Item No. | Statement <sup>a</sup>                                                           |
|----------|----------------------------------------------------------------------------------|
| 1        | I am my own boss.                                                                |
| 2        | If I work hard, I will succeed.                                                  |
| 3        | Whether at work or in my private life: What I do is mainly determined by others. |
| 4        | Fate often gets in the way of my plans.                                          |

<sup>a</sup> = Five-level response scale: I totally agree (1) to I do not agree at all (5)
