# Supplementary material for: Predictors Associated with Health-Related Heat Risk Perception of Urban Citizens in Germany
Source: Int J Environ Res Public Health. 2020 Jan 30;17(3):874. doi: 10.3390/ijerph17030874 (PMC7038119; doi:10.3390/ijerph17030874)
Supplement: Supplementary file 1 [file ijerph-17-00874-s001.zip › BeckmannHiete_S3.xlsx]

## Sheet: Tabelle1
Heat as a problem in…				Knowledge questions																	Health implications during heat
…city	…neighbourhood	…house	Subjective sensitivity	#1	#2	#3	#4	#5	#6	#7	#8	#9	#10	Knowledge score	Mean heat risk perception	Mean risk perception alternative natural hazards	Score internal locus of control	Score external locus of control	Age	Gender	Drowsiness	Sleeping problems	Concentration problems	Vertigo	Headache	Sickness	Cardiovascular problems	Chronic diseases
1	1	1	1	0	1	0	0	0	0	0	0	0	0	1	1	1.17	5	2	3	2	1	1	1	1	1	1	1	0
1	1	2	3	0	0	0	1	0	1	1	0	1	0	2	1.5	2.17	10	2	1	2	1	3	1	2	1	1	1	0
1	2	1	2	1	1	1	1	1	1	1	1	1	1	3	3	3.5	8	5	2	1	2	2	2	2	2	1	2	0
1	1	1	4	1	1	1	1	0	1	1	0	1	0	2	2	1.83	7	6	4	2	2	2	2	1	1	1	1	0
1	1	1	4	1	1	1	1	0	0	1	0	1	1	2	4	3.17	9	3	2	2	2	2	2	2	2	2	2	0
1	1	1	5	1	1	0	1	1	1	1	0	1	0	2	4	3.5	8	3	2	1	3	3	3	3	3	1	3	0
1	2	1	3	1	1	1	0	0	0	1	0	1	0	2	3	3.33	10	4	1	1	2	1	2	1	1	1	1	0
2	2	2	2	1	0	1	1	1	1	1	1	1	0	3	3.5	3.33	9	4	1	1	1	1	1	1	1	1	1	0
1	3	2	4	1	0	0	1	0	1	1	0	1	1	2	2	1.17	10	6	4	1	1	1	1	1	1	1	1	1
1	1	1	5	1	1	1	1	1	1	1	1	1	0	3	4	3.67	10	4	1	1	3	3	2	2	2	2	1	0
1	1	1	5	1	1	1	1	0	1	1	0	1	0	2	4	1.67	4	2	4	1	2	2	2	3	1	2	3	0
2	2	1	5	1	0	1	1	0	1	1	0	1	0	2	3.5	3.33	8	8	3	1	2	2	2	2	2	1	2	0
2	2	3	1	1	1	1	1	0	1	1	0	1	0	2	2.5	3.5	10	4	3	2	1	1	1	1	1	1	1	0
3	3	3	2	1	1	0	0	0	0	1	0	1	0	2	1.5	1.33	10	3	3	1	2	1	1	1	1	1	1	0
3	3	3	1	1	0	1	1	0	0	1	0	1	1	2	1	1.5	10	2	3	1	1	1	1	1	1	1	1	0
2	2	1	5	1	1	1	1	1	1	1	0	1	0	3	4	3.33	10	4	1	1	3	3	3	2	2	2	1	1
1	1	1	4	1	1	1	1	1	0	1	1	1	0	3	3	4	6	8	4	1	1	1	1	1	1	1	1	2
1	1	1	4	1	1	1	1	0	1	1	1	1	0	3	3	3.83	8	4	2	1	3	3	3	2	1	1	2	0
1	3	1	5	0	1	1	1	0	1	1	0	1	0	2	4	2.67	10	7	3	2	3	3	2	2	3	1	2	0
2	1	2	5	1	1	1	1	0	1	1	1	1	0	3	3.5	3.83	7	6	1	1	3	3	3	2	3	2	2	0
4	4	1	4	1	0	1	1	0	1	1	0	1	1	2	3	2.67	9	4	2	1	2	2	1	1	1	1	1	0
2	2	2	4	1	1	1	1	1	0	1	1	1	0	3	4	3.33	10	3	3	2	2	2	1	1	1	1	2	1
2	2	1	4	1	1	1	1	0	0	1	0	0	1	2	3	1.67	8	4	2	2	2	2	2	1	2	1	1	0
2	2	1	1	1	0	0	1	0	1	1	1	1	1	2	2.5	2.67	9	3	1	1	1	2	1	1	2	1	1	0
3	3	3	1	0	0	1	0	0	1	1	0	1	1	2	1.5	1.67	10	3	2	1	1	2	1	1	1	1	1	1
1	1	1	2	1	1	1	1	1	1	1	0	1	0	3	4	3.83	6	7	1	1	2	2	2	1	2	1	1	0
1	1	1	4	1	1	1	1	0	0	1	1	1	0	2	3.5	2.5	10	4	2	2	2	1	3	1	1	1	1	0
1	1	1	4	1	0	1	1	0	1	1	0	0	1	2	2.5	2	10	6	1	2	2	2	3	3	2	1	2	0
1	2	1	5	1	1	1	1	1	1	1	0	1	0	3	3.5	3.33	10	3	2	1	3	3	2	2	2	2	2	0
1	1	3	4	1	1	1	1	0	1	1	0	1	1	3	2	2	10	2	1	2	1	2	2	1	2	1	1	0
1	1	1	5	1	1	1	1	0	1	1	0	1	0	2	2	2	8	4	2	1	3	3	3	3	2	2	2	0
1	1	2	4	1	1	1	1	1	1	1	0	0	1	3	4	3.33	10	4	2	1	2	3	3	2	2	2	1	0
3	3	3	2	1	1	1	1	0	0	1	0	1	1	2	2	2.33	10	2	2	1	2	2	2	2	2	1	1	0
1	1	1	4	1	1	1	1	0	0	1	0	1	0	2	3	2.17	10	4	2	1	2	3	2	1	1	1	2	1
3	3	3	2	1	1	1	1	0	1	1	0	1	1	3	2	1.67	10	4	2	1	2	2	2	1	2	1	1	1
1	1	1	3	1	0	1	0	0	0	1	0	1	0	2	2	2.33	10	3	3	2	2	1	1	1	1	1	1	0
4	4	1	5	1	0	1	1	0	0	1	1	0	1	2	4	4	9	3	1	1	3	3	3	3	3	3	3	0
4	4	4	2	1	1	1	1	1	1	1	0	1	1	3	2.5	2.33	10	4	2	2	2	2	1	1	1	1	1	0
1	1	1	4	1	1	1	1	0	0	1	1	1	1	3	4	4	9	4	2	1	2	3	2	3	1	1	2	0
1	1	1	4	1	1	1	1	0	1	1	0	1	0	2	2.5	2.5	7	5	2	2	3	3	2	1	1	1	1	0
2	2	2	4	1	1	0	1	0	0	1	1	1	0	2	2	2.5	8	6	4	1	2	3	2	2	2	1	1	2
1	1	1	5	1	0	1	1	0	1	1	0	1	1	2	3	2	10	4	1	2	2	3	2	1	1	1	2	0
2	2	3	3	1	0	1	0	0	1	0	0	1	1	2	2	2.17	10	4	2	1	2	2	2	2	2	1	2	0
2	2	2	2	1	0	1	1	0	1	1	1	1	1	3	2.5	1.67	10	3	2	1	2	2	1	2	2	1	1	0
1	1	2	4	1	1	1	1	0	1	1	0	1	0	2	4	3.83	10	2	2	2	2	2	2	3	3	2	2	0
2	2	2	4	1	1	1	1	0	1	1	1	1	0	3	4	4	9	3	1	1	2	3	2	2	2	1	1	0
2	2	1	5	1	1	1	1	0	1	1	0	1	0	2	2.5	2.33	10	5	2	1	2	2	2	1	1	1	1	0
1	1	1	3	1	0	1	1	0	0	1	0	0	1	2	4	3.17	10	4	2	1	3	3	2	2	2	1	1	0
3	3	3	4	1	0	1	1	0	0	0	1	0	1	2	2.5	2.33	6	4	2	1	3	2	2	1	1	1	1	0
1	2	2	4	1	0	1	1	0	1	1	1	1	0	2	3	2	8	5	4	1	2	2	1	1	1	1	2	1
1	2	2	4	1	0	0	1	0	1	1	0	1	1	2	2.5	2.83	10	4	2	2	2	2	2	2	1	1	2	0
1	1	1	5	1	1	1	1	1	1	1	0	1	1	3	4	3.67	7	6	2	1	3	3	3	2	3	2	2	1
2	4	2	2	0	0	0	0	0	1	1	0	1	1	2	1	2.5	8	3	2	1	2	1	2	1	1	1	1	0
1	2	4	4	1	0	1	1	0	1	0	0	1	1	2	1.5	2.33	10	4	2	1	2	2	2	1	2	2	1	0
1	1	1	3	1	1	1	1	0	0	1	0	1	1	2	3.5	3.17	8	4	2	2	2	3	2	1	1	1	1	0
2	4	2	2	1	0	1	0	0	0	1	0	1	0	2	1.5	2	8	8	3	2	1	1	1	1	1	1	2	2
2	2	1	3	1	1	1	1	0	1	1	0	1	0	2	2	2.67	9	5	2	2	2	2	2	1	1	1	1	0
1	2	1	4	1	0	0	0	0	0	1	0	1	0	1	1.5	2	8	6	2	1	2	3	2	2	2	1	1	1
3	3	3	4	1	1	1	1	1	0	1	1	1	0	3	1.5	1.33	10	2	3	2	1	1	1	1	1	1	1	0
1	4	1	5	1	0	1	0	0	0	1	0	1	0	2	2	1.67	10	3	3	1	3	3	2	2	2	2	2	0
2	2	2	4	1	0	1	1	0	1	1	0	1	1	2	3	3	10	5	2	2	2	2	2	1	1	1	1	0
2	2	2	4	1	0	0	1	0	1	1	0	1	0	2	3	3.33	8	3	2	1	2	2	1	2	2	1	2	0
1	1	1	4	1	1	1	0	0	1	1	0	1	1	2	2.5	3.5	10	4	1	2	3	3	3	2	2	2	2	0
2	2	1	4	1	0	0	1	0	1	1	0	1	1	2	2.5	2	10	2	2	2	2	2	1	1	2	1	1	0
4	4	3	2	1	1	1	1	1	1	1	0	1	0	3	1.5	1.67	9	5	2	1	2	2	2	1	2	1	1	0
1	1	1	4	1	1	1	1	0	1	1	0	1	1	3	3	3	9	5	2	2	2	2	1	2	2	1	2	1
3	3	2	1	1	0	1	1	0	0	1	0	1	1	2	3	2.17	7	5	2	2	1	2	3	1	2	1	1	0
4	4	1	4	1	0	1	1	0	1	1	0	1	0	2	2.5	3	9	4	2	1	2	2	2	1	2	1	2	1
1	1	1	5	1	1	1	1	0	0	1	1	0	0	2	4	3.67	6	5	2	2	2	2	3	2	2	2	2	1
2	2	2	4	1	0	1	1	1	1	1	0	1	1	3	4	2.67	8	3	2	2	2	3	2	2	2	1	1	1
4	4	3	2	1	0	1	0	0	0	1	0	1	1	2	1.5	1.67	10	4	2	1	2	2	2	2	2	1	2	0
3	3	3	3	1	0	1	0	0	0	1	0	1	0	2	1.5	2.5	8	4	2	2	1	1	1	1	1	1	1	0
4	2	1	4	1	0	1	1	1	1	1	0	1	0	2	3	2.83	5	7	2	1	2	2	2	2	3	2	2	1
1	1	1	5	1	1	1	1	0	1	1	0	1	0	2	3	2.33	9	3	2	2	3	2	3	2	2	1	2	0
2	2	2	2	1	1	1	1	0	1	1	0	1	0	2	2.5	2.83	9	4	2	1	2	2	2	1	1	1	1	0
1	1	1	4	1	0	0	1	0	0	1	0	1	0	2	3	3.33	6	6	1	1	3	1	3	3	2	3	2	0
2	3	3	2	1	0	1	1	0	0	0	1	1	1	2	1.5	2.17	8	4	2	1	2	1	1	1	2	1	1	0
1	1	1	5	1	1	1	1	0	1	1	1	1	1	3	4	3.5	6	8	1	1	3	3	3	2	2	2	2	1
1	1	1	2	1	1	1	1	1	1	1	0	1	1	3	1.5	3.67	10	2	2	2	1	2	1	1	1	1	1	0
1	1	3	4	1	1	1	1	1	1	1	1	1	0	3	3	3	9	7	2	2	2	2	2	2	1	1	2	1
1	2	4	4	1	0	0	0	0	1	0	0	1	0	1	1	2.33	10	7	3	2	2	3	2	1	1	1	1	0
1	1	1	5	1	1	1	1	0	1	1	0	1	1	3	3	3.5	9	5	2	1	2	2	2	1	2	1	1	0
2	2	2	1	0	0	0	0	0	0	0	0	1	0	1	2	3.5	10	4	2	1	3	2	2	1	1	1	1	0
3	3	4	4	1	0	1	0	0	1	1	0	0	0	2	1	2.67	9	4	2	2	1	1	1	1	1	1	1	0
2	3	3	3	1	1	1	1	0	1	1	0	1	1	3	2.5	2.83	10	4	2	2	2	2	2	1	2	1	1	0
1	1	2	2	1	1	1	1	0	0	1	0	0	1	2	3	3	8	8	3	2	1	1	1	1	1	1	1	0
1	2	1	5	1	1	1	1	0	1	1	1	1	1	3	3	2.67	10	4	2	1	3	3	3	3	3	1	2	0
2	2	2	4	1	1	1	1	0	1	1	0	1	1	3	3.5	2.83	8	4	2	2	2	2	2	1	1	1	1	1
4	2	2	4	1	0	0	1	0	1	0	1	0	0	2	2	2.17	10	3	4	2	2	2	1	1	1	1	1	0
4	4	4	4	1	0	0	0	0	0	1	0	0	0	1	2.5	2.83	10	2	2	1	1	1	1	1	1	1	1	0
2	2	1	4	1	0	0	1	0	1	1	1	1	1	2	3	2.83	8	3	1	1	2	2	2	1	2	1	1	0
3	3	3	4	1	1	1	1	0	1	1	1	1	0	3	3.5	2.5	10	4	2	1	2	2	2	2	2	1	2	0
2	2	2	4	1	0	0	1	0	1	1	0	1	0	2	3	2.5	9	3	1	1	3	2	2	1	2	1	1	0
2	3	3	1	1	1	0	1	0	1	1	0	0	1	2	2.5	1.83	10	7	2	1	3	1	2	1	1	1	1	0
3	3	3	2	1	0	0	1	0	1	1	0	1	0	2	2.5	1.83	8	3	2	1	2	2	2	1	2	1	1	0
1	1	1	5	1	1	1	1	0	0	1	1	1	1	3	4	3.83	10	4	1	1	2	2	3	1	2	1	1	0
1	4	2	4	1	0	0	1	0	1	1	0	1	1	2	3	2.5	8	4	2	1	2	2	3	2	2	1	1	0
1	1	1	5	1	0	1	1	0	0	1	1	1	0	2	4	3	10	3	2	2	2	3	3	1	1	1	2	1
1	4	1	4	1	1	1	1	0	0	1	1	0	0	2	3	2.33	7	6	2	1	1	2	2	1	2	2	1	0
2	2	3	3	1	1	1	1	0	1	1	0	1	1	3	1.5	2.17	10	2	2	1	2	1	1	1	2	1	1	0
2	2	2	4	1	1	0	0	0	1	0	0	1	0	2	3	3.33	9	3	2	1	2	3	2	2	2	1	2	0
2	2	1	5	1	1	1	1	0	0	1	1	1	1	3	3.5	2.5	8	3	2	2	2	2	2	2	2	1	1	0
1	1	1	4	1	0	1	1	1	0	1	1	1	0	2	2	2.33	9	7	3	2	2	2	2	2	1	1	2	0
1	1	1	2	1	0	1	1	0	1	1	0	1	0	2	2.5	2.5	10	5	2	1	2	2	2	1	2	1	1	0
2	2	1	2	1	0	0	1	0	0	1	0	0	0	1	2.5	1.83	8	4	1	2	2	2	1	2	1	1	1	0
2	2	1	5	1	1	1	1	0	1	1	1	1	0	3	3.5	3.33	9	7	4	1	3	2	2	1	1	1	1	1
1	1	2	4	1	0	1	1	0	1	1	0	1	0	2	3.5	3.17	9	5	2	1	2	1	2	2	2	1	1	0
1	1	2	5	1	0	1	1	0	1	1	0	1	0	2	4	3	7	6	2	1	3	2	2	2	3	2	1	0
4	1	1	3	1	1	1	1	0	1	1	1	0	0	2	3	2.83	9	7	2	2	2	3	2	2	1	1	2	0
1	1	1	4	1	1	1	1	1	1	1	1	1	1	3	4	3.67	8	6	2	2	1	2	2	2	2	1	1	0
1	1	4	2	1	1	1	0	0	1	1	0	1	0	2	2.5	2.33	10	3	1	2	2	1	2	1	1	1	1	2
1	1	1	5	1	1	1	1	1	0	1	1	1	1	3	4	3	10	3	2	2	3	3	3	2	2	3	3	1
1	1	1	5	1	1	0	0	0	0	1	0	0	0	1	3.5	3.83	8	5	2	2	2	2	2	1	1	1	1	0
1	1	1	5	1	1	1	1	1	1	1	0	1	0	3	3.5	3.83	8	5	1	1	3	2	2	3	3	1	3	0
4	2	3	2	1	0	1	1	0	1	1	0	1	1	2	2.5	3.5	8	4	2	1	2	1	1	1	1	1	1	0
3	3	1	2	1	0	1	1	1	1	1	0	1	1	3	2	1.33	9	3	1	2	1	2	2	1	1	1	1	0
1	1	1	4	1	1	1	1	0	1	1	0	1	1	3	3.5	3.17	6	4	2	2	2	2	1	2	2	1	2	0
2	2	3	4	1	1	1	1	0	1	1	0	1	0	2	3	2.67	9	4	3	1	2	2	2	1	1	1	2	0
1	3	3	2	1	1	1	0	1	1	1	0	1	1	3	3.5	3.17	10	6	4	2	3	2	1	2	1	1	2	1
1	1	3	5	1	1	1	1	0	1	1	0	1	1	3	2	1.83	10	4	2	2	2	2	2	1	1	1	1	0
2	3	2	4	1	0	0	1	0	0	1	0	1	1	2	2	2.67	7	2	2	1	2	2	2	1	2	1	1	0
2	2	1	2	1	0	1	1	0	1	0	0	1	0	2	3.5	3	9	4	2	2	2	2	1	1	1	1	1	0
1	2	2	4	1	0	1	1	0	0	1	0	0	0	2	4	3.83	8	4	2	1	3	3	3	2	2	1	2	0
1	1	1	5	1	0	1	1	0	1	1	0	1	1	2	3.5	3.17	9	3	1	1	2	1	2	3	3	1	2	0
1	1	2	4	1	0	0	1	1	0	1	1	1	0	2	2.5	2.33	6	6	3	2	2	2	2	2	2	1	2	1
1	2	2	5	1	1	1	1	0	1	1	1	1	0	3	3.5	3.17	9	4	2	1	2	2	3	2	2	2	2	0
1	1	1	4	1	0	1	1	0	0	1	1	1	0	2	2	2	9	5	1	1	2	2	2	1	3	1	1	0
1	1	1	4	1	0	1	0	0	1	1	0	1	1	2	4	3.33	9	5	2	1	3	3	3	2	3	1	1	1
2	2	2	4	0	0	1	1	0	1	1	0	1	0	2	2.5	1.5	9	4	4	1	3	1	2	1	1	1	1	1
2	2	1	4	1	1	1	1	0	0	1	0	0	0	2	2	1.67	9	6	2	1	3	3	2	2	3	1	2	1
2	2	1	5	1	0	1	1	0	0	1	1	0	1	2	3	3	8	4	2	2	3	3	3	1	2	1	1	0
2	2	4	4	1	0	1	1	1	1	1	0	1	0	2	1.5	1.5	10	4	2	2	2	1	2	1	1	1	1	0
3	3	1	4	1	0	1	1	0	1	1	1	1	0	2	2.5	2.5	10	4	1	2	2	1	2	1	2	1	1	0
1	1	1	5	1	0	1	1	0	1	1	0	1	0	2	3.5	3.67	9	4	1	2	3	2	2	1	1	1	1	0
2	2	2	1	1	0	1	0	0	1	1	0	1	1	2	1.5	1.83	10	4	2	2	1	1	1	1	1	1	1	1
3	2	3	2	1	0	1	1	0	1	1	0	1	0	2	1.5	2.17	10	5	1	1	1	2	2	1	2	1	1	0
1	1	1	4	1	0	1	1	0	1	1	0	1	1	2	3.5	3.17	9	3	2	1	2	3	3	2	2	1	1	1
2	4	4	5	1	1	0	0	0	0	1	1	1	0	2	4	3.33	9	4	2	1	2	1	1	2	2	1	1	0
1	1	1	4	1	0	1	1	0	1	1	0	1	1	2	3	2.83	7	6	2	1	3	3	3	2	3	2	2	0
1	1	1	5	1	1	1	1	0	0	1	0	1	0	2	3	3	5	7	2	1	3	2	2	3	2	1	2	1
1	1	1	4	1	1	1	1	1	1	1	0	1	0	3	2.5	2.67	10	4	1	2	2	2	2	1	2	1	1	0
2	2	2	4	1	1	1	1	0	1	1	0	1	0	2	3	3.67	9	4	2	1	1	1	2	2	2	1	2	0
2	2	1	1	1	0	1	1	0	1	1	0	1	0	2	2.5	2.33	9	3	2	2	1	2	1	1	1	1	1	0
2	2	2	4	1	1	0	1	0	0	1	0	1	0	2	2	2.5	8	5	1	1	2	3	2	1	2	1	2	0
2	2	3	4	1	1	1	1	1	1	1	0	1	0	3	3.5	2.17	10	5	1	1	3	2	3	3	3	1	3	1
2	3	3	4	1	1	1	1	0	0	1	0	1	0	2	4	3.33	8	5	2	1	3	3	3	1	2	1	2	0
1	1	1	4	1	0	1	1	0	1	1	0	1	0	2	3.5	4	9	4	2	2	2	3	2	1	1	1	1	0
1	1	3	4	1	0	1	1	0	1	1	0	1	0	2	3.5	2.33	10	2	2	1	2	3	2	2	3	1	2	0
2	2	1	3	1	1	0	1	0	0	1	0	0	0	2	2.5	2.33	9	5	2	2	2	2	2	1	1	1	2	0
1	1	1	4	1	0	1	1	0	0	1	1	1	1	2	3	1.67	7	2	2	1	3	3	3	2	2	3	1	2
4	4	1	5	1	0	1	1	0	1	1	0	1	0	2	4	3.33	10	4	2	1	3	3	3	2	2	1	2	0
4	4	1	5	1	0	1	1	0	1	1	0	0	0	2	3.5	2.83	9	4	2	1	2	3	2	2	2	1	2	1
1	1	1	2	1	0	0	1	0	1	1	0	1	0	2	3.5	3.33	10	2	2	2	1	1	1	1	1	1	1	0
2	3	3	4	1	1	0	0	0	1	1	0	1	1	2	2.5	2	7	5	2	1	3	2	2	1	1	1	1	2
2	2	3	4	1	0	1	0	0	0	1	1	1	0	2	2	2.5	6	3	4	1	3	2	2	2	3	1	2	0
2	2	2	5	1	1	1	1	0	0	0	0	0	1	2	2	3.67	10	4	3	1	2	2	1	1	1	1	1	2
4	4	4	4	1	0	1	1	0	0	1	0	0	0	2	2.5	2	7	5	2	1	2	2	1	1	3	1	2	0
2	2	3	3	1	0	1	1	0	0	1	0	1	1	2	3	3.17	8	4	1	1	2	2	2	1	2	1	1	0
2	2	2	2	1	1	1	1	1	1	1	0	1	0	3	4	4	9	2	2	2	2	3	1	2	2	1	3	1
2	2	2	4	1	0	1	1	1	1	1	0	1	1	3	3.5	3	7	6	2	1	2	2	2	2	2	2	1	0
1	2	2	5	1	1	1	1	0	1	1	0	1	0	2	4	4	10	5	2	1	3	2	3	2	1	1	2	0
1	2	3	4	1	1	1	1	0	1	1	0	1	0	2	3	3.67	10	4	3	2	2	1	1	1	2	1	1	0
2	4	2	4	1	0	1	1	0	1	1	0	0	0	2	3.5	3	8	4	1	2	2	2	2	1	1	1	1	0
1	1	2	4	1	0	1	1	1	1	1	1	1	1	3	1	3.33	7	4	3	1	2	2	1	1	1	1	1	1
1	2	1	4	1	0	1	1	0	1	1	1	1	1	3	2.5	2.5	9	4	1	2	3	3	3	2	2	1	1	1
2	2	2	4	1	1	0	0	0	1	1	0	1	1	2	3	2.17	9	3	1	1	2	2	2	1	2	1	1	0
2	2	2	2	1	0	1	1	0	1	0	1	1	1	2	2.5	3.33	9	5	3	2	2	2	2	1	1	1	1	0
1	1	1	5	1	1	1	1	0	1	1	0	1	0	2	3.5	2.67	10	3	2	1	3	2	3	3	3	3	3	0
2	2	1	2	1	1	1	1	0	1	1	0	1	0	2	2.5	2.83	9	5	2	2	2	2	1	1	1	1	1	0
1	1	1	5	1	1	1	1	0	1	1	0	1	1	3	4	4	7	6	2	1	3	3	3	2	2	1	2	0
2	2	1	4	1	0	1	1	0	0	0	1	1	1	2	2.5	3.17	9	5	2	1	3	3	2	2	2	1	1	0
4	3	2	3	1	0	1	0	0	0	1	0	1	1	2	1.5	2	10	2	1	2	1	2	1	1	1	1	1	0
2	2	2	4	1	1	1	1	1	1	1	0	1	1	3	3	2.67	9	4	2	1	2	1	2	2	2	1	1	0
1	1	1	3	1	1	1	1	0	1	0	0	1	1	2	3	3	10	4	2	2	2	2	2	1	1	1	1	0
1	2	2	1	1	1	1	1	1	1	1	1	1	0	3	2.5	2.33	8	4	2	2	1	1	1	1	1	1	1	0
1	2	4	2	1	0	0	1	0	1	1	0	1	0	2	1.5	2	9	3	2	1	2	1	2	1	2	1	2	0
1	1	1	4	1	0	1	1	0	0	1	0	1	1	2	2.5	3.33	9	3	2	1	2	3	2	2	3	2	2	0
2	2	1	4	1	1	1	1	0	1	1	1	1	1	3	4	3.17	9	8	2	2	3	3	2	2	1	1	3	1
1	2	3	4	1	0	1	1	0	1	0	0	1	0	2	2.5	1.67	8	4	2	2	2	2	2	1	1	1	2	0
4	4	1	5	0	1	1	1	0	1	1	1	1	1	3	2	1.5	10	3	2	1	3	2	2	2	1	1	2	0
2	2	2	1	1	0	1	1	1	0	1	1	1	0	2	2	2.17	9	2	2	1	2	1	1	1	1	1	1	0
2	2	4	4	1	1	0	0	0	0	0	0	0	0	1	3	2.5	10	6	2	1	2	2	2	2	2	1	2	0
2	2	2	4	1	1	1	1	0	1	1	1	1	0	3	2.5	2.33	9	7	3	2	2	2	2	2	2	2	2	0
1	1	2	5	1	1	1	1	1	1	1	1	1	0	3	4	3.5	7	5	1	1	3	2	3	1	2	1	1	0
1	1	2	3	1	1	1	1	1	1	1	1	1	0	3	3.5	3.67	9	4	1	1	2	2	3	2	3	1	2	0
1	1	2	4	1	1	1	1	0	0	1	0	1	0	2	2.5	2.83	10	5	1	1	2	2	2	2	1	2	2	0
2	2	2	4	1	1	0	1	0	1	1	0	1	0	2	2.5	2.5	9	3	1	1	1	3	3	3	2	2	2	1
4	4	1	4	1	1	1	1	1	1	0	0	1	1	3	3	2.67	9	4	2	2	2	2	2	1	1	1	1	0
1	4	2	3	1	1	1	1	0	1	1	0	0	0	2	2.5	3.33	8	4	1	1	2	2	3	1	2	1	1	0
1	1	1	4	1	1	1	1	1	0	1	1	1	1	3	4	3.5	8	4	2	2	2	2	2	1	1	1	1	0
1	2	3	4	1	1	1	1	0	1	1	0	1	0	2	4	2.83	10	3	4	1	3	3	2	3	1	1	2	1
2	2	2	4	1	1	1	1	0	0	1	0	0	0	2	3.5	2.17	10	6	3	2	1	2	2	1	1	1	2	1
1	1	4	4	1	0	1	1	0	1	1	0	1	0	2	3.5	2.67	8	10	2	2	2	3	3	1	1	1	1	0
1	3	3	5	1	1	1	1	0	1	0	1	1	0	2	3.5	2.67	9	4	4	2	2	2	1	2	2	1	2	1
1	2	1	4	1	1	1	1	0	0	1	0	1	0	2	3	2.33	10	6	4	2	2	2	2	1	1	1	1	0
1	1	1	2	1	0	1	1	0	0	1	1	1	0	2	3.5	3.5	10	5	2	2	1	2	2	1	1	1	1	0
4	4	1	4	0	1	0	0	0	0	1	0	0	1	1	3	2.33	9	3	2	1	2	3	2	2	1	1	1	0
1	1	1	5	1	1	1	0	0	1	1	0	1	1	2	4	3	8	5	2	2	3	3	2	2	3	2	1	0
1	1	2	5	1	0	1	1	0	0	1	0	1	1	2	4	3.33	10	4	2	1	3	3	3	2	3	2	3	0
1	1	1	4	1	0	1	1	1	0	1	0	1	0	2	4	3	8	5	2	2	2	2	2	1	1	1	1	0
3	3	3	2	1	0	1	0	0	1	1	0	1	1	2	2	1.5	10	5	3	1	2	2	2	3	1	1	2	1
1	1	1	5	0	0	1	1	1	0	1	0	1	0	2	4	3.5	7	9	2	1	3	2	3	2	2	2	3	1
4	4	1	4	1	0	1	0	0	1	1	0	0	0	2	2.5	2	7	7	2	1	2	3	2	2	2	1	2	0
2	2	2	5	1	1	1	1	0	1	1	0	1	0	2	1.5	2.17	10	3	2	1	2	2	2	2	1	1	2	1
4	4	1	5	1	1	1	1	0	1	1	0	1	1	3	3	3	8	4	2	1	3	2	2	1	2	1	2	0
1	1	1	5	1	1	1	1	0	1	1	0	1	1	3	4	4	10	5	2	1	3	3	3	3	3	2	3	0
1	1	1	1	1	1	1	1	1	1	0	1	1	1	3	2.5	2.67	7	6	2	2	2	2	2	1	1	1	1	1
3	3	1	2	1	1	1	1	0	1	1	0	1	1	3	2	1.83	10	2	2	1	3	3	2	2	1	1	1	0
4	4	4	4	1	0	1	0	0	1	1	0	1	0	2	2.5	3.17	7	3	2	1	2	1	2	2	2	1	1	0
2	2	1	4	1	1	0	1	0	0	1	0	0	0	2	1.5	1.83	9	2	2	1	1	1	2	1	1	1	1	0
2	2	1	4	1	1	1	1	0	1	1	0	1	0	2	3	3	10	4	2	1	2	3	2	2	2	1	2	0
1	1	1	5	1	1	1	0	0	1	1	0	1	1	2	4	3.67	9	5	1	1	3	2	3	3	3	2	1	0
2	2	2	4	1	1	0	0	0	0	1	0	1	0	2	2	3.5	8	3	2	1	3	3	3	2	2	2	2	1
2	2	2	4	1	0	1	1	0	0	1	0	1	0	2	1.5	1.83	7	2	2	2	2	2	2	1	1	1	1	0
1	1	2	4	1	0	1	1	0	1	1	0	1	0	2	4	3.5	9	4	3	1	1	1	2	1	1	2	1	1
1	1	1	5	1	1	1	1	0	0	1	0	0	1	2	4	2.83	10	3	2	1	3	3	3	3	3	2	2	0
1	1	1	3	1	1	1	1	0	0	1	0	1	0	2	2.5	2.67	9	4	1	2	2	2	1	1	2	1	1	1
2	3	3	5	1	0	1	1	0	1	1	0	1	1	2	3	3.33	9	4	2	1	2	2	2	2	2	2	2	0
2	2	3	4	1	1	0	1	0	1	0	0	1	0	2	2.5	1.83	8	4	3	2	2	2	2	2	1	1	1	0
2	2	1	4	0	0	0	1	1	1	1	0	1	1	2	3	2.17	4	5	1	1	2	3	2	3	3	2	1	0
2	2	2	4	1	1	1	1	0	1	1	0	1	0	2	2	2.5	10	4	2	2	2	2	1	2	1	1	1	0
1	3	1	4	1	0	1	1	0	0	1	0	1	0	2	3	2.33	10	3	2	1	3	3	2	2	3	1	3	0
2	2	2	5	1	0	1	1	0	0	1	0	1	1	2	3	2.5	8	4	2	2	2	2	2	2	2	1	2	0
3	3	3	1	1	1	0	0	0	1	1	0	1	1	2	2.5	1.17	10	4	4	1	1	1	1	1	1	1	1	0
2	2	2	4	1	1	1	1	0	0	1	0	0	0	2	2.5	2.67	10	4	2	2	2	2	2	1	2	1	1	1
1	2	2	5	1	1	1	1	1	0	1	1	0	1	3	3	3.67	10	9	2	1	3	3	3	3	1	1	1	0
2	2	2	4	1	1	1	1	0	1	1	0	1	1	3	2.5	2	10	4	2	1	2	2	1	1	1	1	1	0
2	1	3	2	1	1	0	1	0	0	1	1	1	1	2	3	2	9	7	4	1	2	2	2	1	1	2	3	1
2	3	4	4	1	0	1	1	0	1	1	0	0	0	2	2	2	9	3	2	1	2	1	2	1	2	1	2	0
1	2	1	4	1	0	1	1	1	0	0	0	1	0	2	2.5	2.33	10	4	2	2	2	2	2	2	1	1	1	0
1	2	3	3	1	0	1	1	1	1	1	0	1	0	2	2.5	3.33	9	8	2	1	2	1	1	1	1	1	1	0
1	4	4	2	0	0	0	0	0	0	0	0	0	0	1	1	1	10	7	4	1	1	2	1	1	1	1	1	1
1	1	1	5	1	1	0	0	0	0	0	0	0	0	1	2.5	2.17	6	5	2	2	3	1	2	2	2	1	1	0
1	2	2	4	1	1	1	1	0	1	1	0	0	1	2	3.5	3.83	9	5	2	1	3	3	2	1	1	2	2	0
1	4	1	4	1	0	1	1	0	1	1	0	1	0	2	2	3.5	10	3	1	1	2	2	3	1	2	2	1	0
1	2	1	4	1	0	0	1	0	1	1	1	1	0	2	3	3.5	7	5	1	1	2	2	3	3	2	2	1	0
1	1	3	3	1	0	1	0	0	1	1	0	1	0	2	1.5	2	10	4	4	2	1	1	1	1	1	1	2	1
2	1	1	4	1	0	0	1	1	1	1	0	1	1	2	3	3	7	7	2	1	2	2	2	1	2	1	2	0
1	1	3	3	1	1	1	1	0	1	1	1	1	1	3	4	2.5	10	10	4	2	3	1	1	1	1	1	1	0
4	3	3	4	1	0	1	1	0	1	1	1	1	0	2	1.5	1.5	10	7	1	1	1	1	2	2	2	2	2	0
1	1	2	4	1	1	1	1	0	1	1	1	1	0	3	2.5	3.17	9	2	1	2	2	1	1	2	2	1	1	0
2	2	1	4	1	1	1	1	1	0	1	0	1	0	2	2.5	3	9	4	2	1	3	2	3	2	2	1	1	0
1	1	1	5	1	1	1	1	0	1	1	0	1	1	3	4	3.5	10	4	2	1	3	2	2	2	1	1	2	0
1	1	3	2	1	1	1	1	0	1	1	0	1	0	2	3	2.67	10	2	2	2	1	1	1	1	1	1	1	0
4	4	3	4	1	1	1	1	1	0	0	0	1	0	2	2	2.5	9	5	2	2	2	2	2	1	2	1	1	0
2	2	2	3	1	1	1	1	1	1	1	0	1	1	3	1.5	1.83	9	5	2	2	2	2	2	1	1	1	1	0
2	2	2	4	1	0	1	1	0	1	1	1	1	0	2	3	3.33	9	6	2	2	2	1	2	1	1	1	1	0
4	3	3	2	1	1	1	1	0	1	1	0	0	0	2	2.5	2.33	10	4	3	2	2	2	2	1	1	1	2	1
2	2	3	2	1	1	1	1	0	1	1	0	0	0	2	3	3.17	9	7	1	1	3	2	3	2	2	2	1	0
1	4	3	3	1	1	1	1	0	1	1	1	1	1	3	2.5	2.83	8	4	1	2	1	1	1	1	1	1	1	0
2	2	1	4	1	1	1	1	1	0	0	1	1	1	3	2.5	1.67	8	4	2	2	2	2	2	1	1	1	1	0
4	4	1	5	1	1	1	0	0	1	1	1	1	0	2	2.5	3.17	8	4	1	1	3	3	3	3	2	2	3	0
1	1	1	3	1	1	1	1	0	0	1	0	1	0	2	4	3.83	10	2	2	2	2	3	3	3	3	1	1	0
3	3	3	3	1	1	1	1	0	1	1	0	1	0	2	2	2.33	8	4	3	2	2	2	1	1	1	1	1	0
2	2	2	4	1	0	1	0	1	1	1	0	0	0	2	2.5	3.17	8	6	2	1	3	2	1	1	2	1	1	2
1	1	1	5	1	1	1	1	0	0	1	0	0	0	2	4	3.33	8	8	2	1	3	3	3	3	3	2	3	1
2	1	2	5	1	0	1	1	0	1	1	1	1	0	2	2.5	2.5	10	4	1	1	3	3	3	3	3	2	2	0
3	3	3	2	1	0	1	1	0	1	1	0	1	0	2	2	2.5	10	4	2	1	2	1	2	1	1	1	1	0
2	2	3	3	1	0	1	1	1	1	1	0	1	0	2	3	2.5	10	2	1	1	2	3	2	2	3	2	1	0
2	4	2	4	1	1	1	1	0	1	1	0	1	0	2	3.5	2.67	9	5	1	2	3	3	3	1	2	1	1	0
1	1	1	5	1	0	1	0	0	1	1	1	1	0	2	4	3.67	8	4	2	1	3	3	2	3	2	1	2	1
1	1	2	5	1	1	1	1	1	0	1	1	1	0	3	4	3.67	8	5	1	1	3	3	3	1	2	1	1	0
1	1	2	4	1	1	1	1	0	1	1	0	1	0	2	4	3.67	8	3	3	1	2	1	1	1	1	1	2	0
1	1	3	3	1	1	1	1	0	0	1	0	1	0	2	2.5	3	10	5	2	1	2	2	2	2	2	2	1	0
1	1	1	5	1	1	1	1	0	1	1	0	0	0	2	4	3.67	7	6	2	2	3	2	2	1	2	1	2	0
1	1	1	4	1	1	0	0	0	0	1	0	1	0	2	3	1.5	9	4	2	2	2	2	2	1	1	1	1	0
2	2	1	3	1	1	1	1	0	1	0	0	1	1	2	3	2.83	9	5	1	1	3	2	3	2	3	1	1	0
1	1	1	4	1	0	1	1	0	1	0	0	1	1	2	2	2.17	8	4	1	1	2	3	2	1	2	1	1	1
1	1	1	2	1	1	1	1	0	1	1	0	1	1	3	2	1.5	9	3	4	2	1	1	1	1	1	1	1	0
1	1	4	4	1	1	1	1	1	1	1	0	1	0	3	2	1.83	9	4	2	1	3	2	2	1	2	1	1	0
3	3	2	2	1	1	1	1	1	0	1	0	0	1	2	1.5	1.5	10	2	2	1	2	2	2	2	2	1	1	1
1	1	1	4	1	1	1	1	0	1	1	1	0	0	2	4	4	8	4	2	2	2	2	2	2	2	1	1	0
1	2	2	4	1	0	1	1	0	1	1	0	1	1	2	3	2.83	7	4	2	1	2	2	2	1	1	1	2	0
2	2	2	4	1	0	1	1	0	1	1	0	1	0	2	4	3.67	9	3	2	2	2	2	2	1	1	1	1	0
1	1	1	5	1	1	1	1	1	1	1	0	1	1	3	3.5	3.5	10	4	2	1	2	2	3	2	2	1	2	0
1	1	1	4	1	1	1	1	0	1	1	0	1	0	2	3	3.5	9	5	2	1	2	3	2	1	2	1	1	0
3	3	3	2	1	1	1	1	1	0	1	0	1	1	3	2	2.17	8	4	2	1	1	2	1	1	1	1	1	0
2	2	3	2	1	1	1	1	1	0	1	1	1	1	3	3.5	4	7	8	2	1	2	2	2	1	2	1	1	0
2	2	2	3	1	1	1	1	0	1	1	0	0	0	2	2	2.83	10	3	3	1	1	1	1	1	1	1	1	0
2	1	2	4	1	1	1	1	1	0	1	0	1	1	3	2.5	2.17	9	4	3	1	2	1	2	1	2	1	1	1
1	1	1	5	1	1	1	0	0	0	1	1	1	0	2	4	3.5	10	7	2	1	3	3	3	3	3	2	2	0
4	4	1	4	1	0	1	1	1	1	1	1	1	0	3	4	4	8	4	2	2	2	2	2	1	1	1	1	0
1	1	1	5	1	1	1	1	0	1	1	1	1	1	3	4	3.5	9	2	2	1	2	3	2	3	3	2	2	0
1	1	1	5	1	1	1	1	0	1	1	0	1	1	3	4	2.83	7	3	2	2	2	2	2	1	2	1	1	0
3	3	3	4	1	1	1	1	1	1	1	1	1	1	3	4	4	10	2	2	2	1	2	1	1	1	1	1	0
1	1	1	4	1	1	1	0	0	1	1	0	1	0	2	4	4	10	4	1	1	3	3	3	3	3	2	3	0
1	2	1	3	1	0	1	0	1	1	1	1	1	1	3	3.5	3	10	5	2	1	2	2	1	1	1	1	1	0
1	1	2	4	1	0	0	1	0	1	1	1	1	0	2	4	4	10	4	2	1	2	1	2	2	2	1	1	0
1	2	2	4	1	0	1	1	0	1	1	0	1	1	2	2	1.83	9	5	3	1	2	1	2	2	1	1	1	0
2	3	3	5	1	0	1	1	0	1	0	0	1	1	2	1.5	1.83	10	6	2	1	2	2	2	1	2	1	1	1
2	2	2	4	1	1	1	1	0	1	1	0	1	1	3	2.5	2.83	6	8	2	2	3	2	3	1	1	1	1	0
2	2	2	5	1	1	1	1	0	0	1	0	1	0	2	4	3.83	10	4	2	1	2	1	3	1	1	2	1	0
1	1	1	2	1	1	1	1	0	1	1	0	1	0	2	3	2.67	10	4	1	2	2	1	2	1	1	1	1	0
1	2	3	1	1	1	1	1	1	1	1	0	1	0	3	4	3.17	10	5	4	1	3	1	3	1	1	1	1	1
4	4	3	4	1	0	0	1	0	0	1	0	1	1	2	3	2.67	9	3	2	2	2	3	2	2	1	1	1	0
1	1	1	5	1	1	0	0	0	0	1	0	0	0	1	4	3.33	10	4	2	1	3	3	2	2	3	2	1	0
2	2	2	4	1	0	1	1	0	1	1	0	1	0	2	2.5	2.33	7	5	2	1	3	3	2	2	2	2	2	1
1	1	1	5	1	1	1	1	0	1	1	0	1	1	3	4	4	9	10	2	2	2	3	2	1	2	1	1	1
1	2	4	5	1	0	0	1	1	1	1	1	1	1	3	3	3.5	8	4	2	1	3	2	3	3	3	1	3	0
2	2	1	2	1	0	1	1	0	1	0	0	1	0	2	2.5	1.83	9	4	1	2	2	2	1	2	3	1	1	0
1	1	1	4	1	0	1	1	0	1	0	0	1	1	2	2.5	3.17	10	5	2	2	2	3	2	1	1	1	1	1
2	2	2	2	1	0	0	0	0	1	0	0	1	1	2	1.5	1.33	10	4	1	2	2	2	2	1	1	1	1	0
1	1	1	4	1	1	1	0	0	0	1	0	1	1	2	2.5	2.83	9	6	2	2	2	2	2	2	2	1	1	0
1	1	4	4	1	0	1	1	0	1	1	0	1	0	2	4	3.17	10	2	2	2	2	1	2	2	2	2	1	0
1	1	1	4	1	0	1	1	1	1	1	1	1	1	3	2.5	2.33	7	4	1	2	2	3	3	3	2	1	1	0
1	1	1	4	1	0	1	1	1	1	1	1	0	1	3	2.5	2.5	7	4	1	2	2	3	3	2	2	1	1	0
4	4	2	4	1	1	1	1	0	1	1	0	1	0	2	3.5	2.83	9	4	2	1	2	1	2	1	1	1	2	0
1	1	1	5	1	1	1	1	0	0	1	0	0	0	2	2	1.83	10	2	1	2	2	2	2	2	2	1	1	0
1	1	1	5	1	1	1	1	1	0	1	1	1	1	3	4	3.33	10	2	1	1	3	3	2	3	3	2	2	1
2	4	1	5	1	1	1	1	0	1	1	0	1	1	3	2.5	2.67	8	4	2	1	3	2	2	2	2	3	1	0
1	1	1	4	1	0	1	1	1	1	1	0	1	1	3	4	4	7	6	2	2	2	2	3	1	1	1	1	0
1	2	1	5	1	1	1	0	0	0	0	0	0	0	1	2.5	2.5	10	4	4	2	2	2	3	3	2	2	2	1
2	1	1	3	1	1	1	1	0	1	1	1	1	1	3	3	4	10	4	1	1	2	1	2	1	2	1	1	1
1	4	1	5	1	1	0	0	0	0	1	0	1	1	2	2.5	2.5	9	4	1	1	3	3	1	2	2	1	1	0
1	1	4	2	1	1	1	1	0	1	1	0	1	0	2	2.5	2.83	9	4	1	1	1	2	2	1	2	1	1	0
2	2	3	5	1	1	1	1	1	1	1	0	1	0	3	4	3.5	7	4	2	1	2	1	1	2	2	1	1	1
2	2	1	5	1	0	1	1	0	1	1	0	1	0	2	3.5	3	8	5	2	1	3	2	2	2	2	2	2	1
2	2	1	4	1	0	1	1	0	0	1	1	1	1	2	2.5	1.67	7	5	2	2	2	2	3	1	1	1	1	0
3	3	3	2	1	1	1	1	0	0	1	0	1	1	2	1.5	1.17	10	4	4	2	2	1	1	1	1	1	1	0
1	1	1	3	1	1	1	0	0	1	1	0	1	0	2	1.5	2	10	3	2	1	1	1	2	1	1	1	1	0
1	1	1	4	1	0	1	1	0	1	1	0	1	0	2	4	3.33	7	6	2	2	2	2	2	1	2	1	1	0
2	2	1	5	1	0	1	1	1	0	1	0	0	1	2	4	3.33	8	6	1	1	1	1	2	2	2	1	1	1
1	1	2	3	1	0	0	1	0	1	1	0	1	0	2	3.5	3.33	8	3	2	2	2	2	2	1	2	1	1	0
1	3	3	4	1	1	1	1	0	1	1	0	1	0	2	1.5	2.17	9	4	2	1	2	2	2	1	2	1	2	0
1	2	2	4	1	0	1	1	0	0	1	1	1	0	2	3	3.83	10	4	1	2	1	1	3	2	2	1	1	1
1	1	2	4	1	1	1	1	1	0	1	0	0	0	2	3	1.83	10	3	2	2	2	3	2	2	1	1	2	0
1	1	1	5	1	1	0	1	0	1	1	0	1	0	2	3	2.83	7	4	3	1	2	2	2	1	1	1	1	1
2	3	3	2	1	0	1	1	0	0	1	0	1	1	2	1.5	2	10	3	2	1	2	1	1	1	1	1	1	0
1	1	1	5	1	1	1	1	1	1	1	1	1	0	3	3.5	3.5	8	5	1	2	2	2	3	2	3	1	2	0
1	1	1	5	1	1	1	0	0	1	1	0	1	1	2	4	2.83	9	4	2	1	3	3	1	2	2	2	2	1
4	3	3	4	1	0	1	1	0	1	1	1	1	1	3	2.5	2.67	10	2	2	1	2	2	1	1	1	1	1	0
1	2	1	5	1	1	0	1	0	1	1	0	1	0	2	3.5	3.33	8	5	2	1	3	3	2	2	2	1	3	0
2	2	1	4	1	0	1	1	1	1	1	0	1	0	2	4	3.67	6	6	2	1	2	3	2	2	3	3	2	0
2	2	3	2	1	0	0	0	0	1	1	0	1	1	2	1.5	2.83	8	4	2	1	2	3	1	1	2	1	2	0
1	1	1	4	1	0	1	0	0	1	1	0	1	0	2	2.5	2.5	9	3	2	1	1	2	2	1	1	1	2	0
1	1	1	5	1	0	0	1	0	1	1	1	1	0	2	4	2.33	9	3	1	1	3	2	2	3	3	1	1	0
2	2	2	3	1	0	1	1	0	0	1	0	1	1	2	2	3.33	6	6	2	2	1	2	1	1	1	1	1	0
1	2	1	4	1	1	1	0	0	0	1	0	1	0	2	4	3.33	10	4	1	2	2	3	2	2	2	2	1	0
3	3	3	3	1	0	0	1	1	1	1	0	0	0	2	3	2.83	5	6	2	1	1	2	2	2	1	1	1	0
2	2	1	4	1	0	1	1	0	1	1	0	1	0	2	3	3	10	7	2	1	2	3	3	1	2	1	1	0
2	2	2	4	1	1	1	1	0	0	1	0	1	1	2	3	3.17	8	5	1	2	1	2	1	1	2	1	1	0
3	3	3	4	1	0	1	1	0	0	1	1	1	1	2	3.5	3.5	7	4	2	1	2	2	1	1	2	1	2	0
2	2	2	3	1	0	1	0	0	0	1	0	1	0	2	2	2	9	3	2	2	1	1	1	1	1	1	1	0
3	1	1	4	1	1	1	1	0	0	1	1	0	1	2	2	1.67	7	5	2	2	2	2	1	1	1	1	2	0
2	2	1	4	1	1	1	1	1	1	1	1	1	1	3	3.5	2.83	8	3	2	1	2	2	1	1	2	1	1	0
3	3	1	5	1	0	0	0	0	0	1	1	1	0	2	2.5	3.33	10	2	1	2	3	3	2	2	2	1	2	0
1	1	2	5	1	1	1	1	0	1	1	0	0	1	2	3	2	9	6	2	1	2	3	2	2	3	1	2	1
1	1	1	3	1	0	1	1	1	1	1	1	1	0	3	4	3.67	9	5	1	2	3	3	3	2	2	1	1	0
1	1	1	5	1	1	1	1	0	0	1	1	1	0	2	4	4	9	5	2	1	3	3	2	2	2	1	2	1
1	1	1	5	1	1	1	1	0	0	1	1	0	1	2	4	2.67	10	3	2	1	3	3	2	2	1	1	3	1
1	1	1	5	1	0	1	1	0	0	1	1	1	0	2	4	3	5	8	2	2	3	3	1	1	1	1	2	1
2	3	3	4	1	1	0	1	1	1	1	1	1	1	3	4	2.17	10	4	2	2	3	3	2	1	2	1	2	0
2	2	2	1	1	1	1	1	0	1	1	0	1	0	2	2	2.33	10	3	1	2	1	1	1	1	1	1	1	1
2	3	1	4	1	0	1	1	1	1	1	0	1	0	2	3	2.83	7	8	2	1	2	3	1	1	1	1	2	1
2	2	1	2	1	1	1	1	0	1	1	0	1	0	2	3	2.83	7	5	2	1	2	1	2	1	2	1	1	1
2	2	3	2	1	1	1	1	0	1	1	0	1	1	3	2	2.33	10	2	3	1	1	1	1	1	1	1	1	1
1	1	1	4	1	0	1	1	1	0	0	0	1	1	2	2.5	2.67	9	3	2	1	1	2	1	1	1	1	1	0
1	2	4	4	1	1	1	1	0	1	0	0	0	0	2	2.5	2.5	10	3	2	1	2	1	2	2	2	1	1	0
1	1	1	5	0	1	0	1	0	0	1	1	1	0	2	4	4	10	5	1	1	3	3	3	3	2	1	3	2
4	4	4	1	1	0	1	0	0	1	1	0	1	0	2	2	2.83	10	2	1	2	1	1	1	1	1	1	1	0
2	2	2	3	1	1	1	1	1	0	1	0	1	0	2	3	2.83	8	4	4	2	1	1	1	1	1	1	1	0
2	1	1	4	1	1	1	1	1	0	1	1	1	1	3	2.5	3	10	3	2	2	2	3	3	2	2	2	2	1
4	4	1	2	1	0	0	0	0	0	1	0	1	0	1	2	3.5	10	5	2	1	2	2	2	2	2	1	2	0
2	3	3	4	1	1	0	1	1	1	1	0	1	1	3	4	2.5	10	5	1	2	1	3	1	1	1	1	1	1
3	3	3	1	0	1	0	0	0	1	0	0	1	0	1	2.5	3.83	10	2	2	2	1	1	1	1	1	1	1	0
2	2	1	3	1	0	1	1	1	0	1	0	1	1	2	2.5	1.67	10	2	2	2	2	3	3	2	2	1	1	0
4	4	1	5	1	0	1	0	0	0	0	0	1	0	1	3.5	3	10	7	2	1	3	3	2	2	1	1	1	0
1	1	1	4	1	0	1	1	1	1	1	0	1	0	2	3	4	10	5	2	1	1	2	2	1	1	1	1	0
1	1	1	5	1	1	1	1	0	1	1	1	1	1	3	2.5	1.67	10	4	2	1	3	3	2	1	1	1	2	0
2	2	2	4	1	0	1	1	0	1	1	0	1	0	2	2	2.33	10	5	3	1	2	2	2	2	2	2	2	1
2	2	2	2	1	1	0	1	0	1	1	0	1	1	2	3.5	3.5	10	6	1	1	2	2	2	1	1	1	1	0
1	1	1	5	1	1	1	1	0	1	1	0	1	0	2	4	3.5	7	5	2	1	3	3	3	1	1	1	3	1
2	1	1	4	1	0	1	1	0	1	1	0	1	1	2	2.5	2.67	10	5	2	1	2	2	2	1	1	1	1	0
1	1	1	4	1	0	1	1	1	1	0	0	1	0	2	3	2.5	7	4	2	1	2	3	2	1	1	1	2	0
4	4	4	3	1	1	1	1	0	1	1	0	1	1	3	2	1.83	8	2	2	2	2	2	1	1	1	1	1	0
2	3	1	3	1	1	1	1	0	1	1	0	1	1	3	2.5	2.67	9	3	2	2	2	2	2	1	1	1	1	0
1	1	2	4	1	1	1	1	0	0	1	0	1	1	2	3	2.33	9	6	2	1	2	2	2	2	2	1	2	1
2	1	1	4	1	1	0	0	0	0	0	0	0	0	1	2	1.5	4	4	2	2	1	3	1	2	1	1	2	0
1	1	1	4	1	0	1	1	0	1	1	0	1	1	2	2	2.33	6	6	2	1	3	3	2	1	1	2	2	0
1	1	1	5	1	1	1	1	0	1	1	0	1	0	2	3.5	2.5	7	5	2	1	3	3	3	2	3	2	2	0
2	2	3	5	1	1	1	1	1	0	1	1	1	1	3	3.5	3.5	8	3	2	1	2	1	2	2	2	1	3	0
1	1	1	5	0	1	1	1	0	1	1	0	1	0	2	1.5	1.17	7	5	2	1	2	2	2	1	1	1	2	0
1	2	2	4	1	0	0	1	0	1	1	0	1	1	2	3.5	2.83	9	3	1	2	1	2	2	1	2	1	1	0
1	2	1	5	1	0	1	1	0	0	1	1	1	0	2	4	3.83	9	7	2	1	1	3	3	2	3	2	3	0
2	2	2	4	1	1	0	1	0	1	1	0	1	0	2	3	3.5	9	2	2	1	1	1	2	2	2	1	2	0
1	1	1	4	0	1	1	0	0	0	0	0	0	0	1	3	3.17	8	6	1	2	2	1	2	2	2	1	1	0
2	2	2	4	1	0	1	1	0	1	1	0	1	0	2	3	3.33	10	2	1	1	2	2	1	2	2	1	1	0
2	2	4	4	1	0	1	1	0	1	0	0	1	1	2	3.5	2.5	8	4	1	1	2	2	3	2	2	1	2	0
1	3	1	2	1	1	0	1	1	1	0	0	1	1	2	1.5	2.83	8	2	2	1	1	2	2	1	1	1	1	0
4	1	1	4	1	0	1	0	0	1	1	0	1	0	2	3	2.67	8	3	2	1	2	2	3	1	2	1	1	0
4	4	2	4	1	0	1	1	0	1	1	0	0	0	2	2.5	2.5	9	4	2	2	2	2	2	2	2	1	2	0
1	2	2	5	1	1	0	1	1	1	1	0	1	0	2	2	3.17	9	6	2	1	3	3	2	2	2	1	2	0
1	1	1	4	1	1	1	1	1	1	1	1	1	0	3	4	2.67	8	4	2	1	3	2	3	2	2	1	1	1
2	2	2	4	1	0	0	1	0	1	1	0	1	0	2	1.5	1.67	10	3	2	1	2	2	2	1	2	1	1	0
1	3	3	1	1	0	0	0	0	0	1	1	1	1	2	1.5	2.67	10	4	4	2	2	1	1	1	1	1	1	0
1	1	1	5	1	1	1	1	1	1	1	0	1	1	3	4	3	9	2	2	2	3	3	3	1	1	1	2	0
1	1	1	4	1	1	1	1	1	1	1	0	1	1	3	3	3.17	10	4	2	2	3	3	3	2	2	1	1	0
2	1	1	4	1	0	1	1	0	0	1	0	1	1	2	3	3.5	10	4	2	1	2	3	2	1	2	1	1	0
2	2	2	2	1	0	1	0	1	1	1	0	0	0	2	2.5	3.83	10	3	1	1	2	1	2	1	2	1	1	0
4	4	4	4	1	1	1	1	0	1	1	0	1	1	3	2.5	2.33	8	5	2	2	2	2	1	1	1	1	1	0
2	2	2	4	1	0	1	1	0	1	1	1	1	1	3	2.5	2	8	3	2	1	2	2	2	2	2	2	2	0
1	1	1	4	1	1	1	1	1	1	1	1	0	0	3	3	2.5	10	6	1	1	2	2	3	2	2	1	1	0
1	2	1	5	1	1	1	1	0	0	1	0	1	0	2	3	2.17	10	5	1	1	3	3	3	3	3	1	2	1
4	1	4	4	1	0	1	1	0	0	1	0	0	0	2	4	3	9	3	4	2	2	2	2	2	2	1	2	2
2	2	2	4	1	0	1	1	0	1	1	1	1	0	2	3	3.17	9	2	3	1	2	2	2	2	1	1	2	0
2	2	2	4	1	1	1	1	0	0	1	0	1	1	2	1.5	1.33	10	3	2	2	2	2	2	1	1	1	1	0
4	3	1	2	1	0	1	0	0	1	1	0	1	0	2	1.5	2	7	5	1	1	2	1	3	2	1	1	1	0
1	1	1	5	1	0	1	1	1	1	1	1	1	1	3	4	3	6	2	2	2	3	3	1	1	2	1	2	0
4	4	2	4	1	1	1	1	0	1	1	0	1	0	2	3	4	7	5	3	2	2	2	2	2	2	1	2	2
2	2	2	5	1	1	1	0	0	1	1	0	0	1	2	2.5	2.5	10	4	4	2	3	2	2	2	2	2	2	1
2	2	2	5	1	1	1	1	0	0	1	0	1	0	2	3	1.83	8	6	2	1	3	3	3	3	3	2	3	2
1	1	1	5	1	1	0	1	0	1	1	0	1	1	2	3	2.33	9	3	1	2	3	3	2	2	1	1	1	0
1	2	3	4	1	0	0	0	0	1	1	0	1	0	2	1.5	1.67	9	6	4	1	2	2	2	2	1	1	1	0
2	1	1	4	1	0	1	1	0	1	1	1	1	1	3	3	3.33	8	4	1	1	2	2	2	1	2	1	1	0
1	1	1	5	1	1	1	1	0	1	1	0	1	0	2	2	3.67	6	5	1	1	1	2	3	1	2	1	1	0
2	4	2	5	1	0	1	1	1	1	1	1	0	0	2	4	2.5	9	6	3	1	3	3	3	3	2	1	3	1
4	4	3	4	1	1	1	0	0	1	1	1	1	0	2	2.5	3	6	4	2	1	3	2	2	1	1	1	1	0
2	2	3	5	1	1	1	0	0	1	1	0	1	1	2	1.5	2.17	9	4	2	1	2	2	1	1	2	1	1	0
1	2	2	4	1	1	1	1	1	1	1	0	1	0	3	4	3.5	9	4	1	2	2	2	3	2	2	1	1	0
1	2	2	4	1	0	1	1	1	1	1	0	1	1	3	2.5	1.33	10	2	3	2	2	1	2	1	1	1	1	0
3	3	3	1	1	0	1	1	0	1	1	0	1	1	2	2.5	1.83	10	4	3	1	2	1	1	1	1	1	1	0
1	1	1	4	1	1	1	1	0	1	1	0	1	0	2	1	2.83	9	4	2	2	2	2	3	2	2	1	1	2
2	2	2	3	1	0	1	1	0	1	1	0	1	1	2	2	1.83	8	4	2	1	2	2	2	1	1	1	1	0
2	2	2	4	1	1	1	1	0	1	1	0	1	1	3	2.5	1.83	8	4	1	1	3	2	2	2	2	2	2	0
4	4	1	5	1	1	1	1	1	1	1	0	1	1	3	3	3.67	8	4	2	2	2	2	2	2	1	1	1	0
1	1	1	4	1	0	1	1	0	1	1	0	1	0	2	3	3.33	6	6	2	1	2	3	3	2	2	1	2	1
1	1	1	5	1	1	1	1	1	0	1	0	1	1	3	4	3.67	7	5	1	2	3	2	2	2	2	2	2	0
1	1	3	5	1	1	1	1	1	1	1	0	1	0	3	4	4	7	8	3	1	2	2	2	2	2	2	2	1
1	2	1	5	0	0	1	1	1	1	1	0	1	0	2	4	3.67	7	4	2	2	2	1	3	2	2	2	3	1
2	2	3	5	1	0	1	1	0	1	1	0	1	1	2	2.5	2.17	8	5	2	2	1	2	2	1	2	1	1	0
3	3	1	3	1	0	1	1	0	1	1	0	1	0	2	1.5	2.17	10	3	2	1	1	2	2	1	2	1	1	0
1	1	1	4	1	0	1	1	0	1	1	0	1	0	2	2.5	3.67	5	7	2	2	2	2	3	1	1	1	1	0
2	2	1	1	1	0	1	1	0	0	1	0	1	0	2	1.5	1.67	10	2	2	1	1	1	1	1	1	1	1	0
2	1	1	4	1	0	0	1	0	1	1	0	1	1	2	3.5	3.33	7	7	2	1	2	3	2	1	2	1	2	0
3	3	3	1	0	0	1	1	0	0	1	0	0	0	1	2.5	3.17	9	3	4	2	1	1	1	1	1	1	1	0
1	2	2	4	1	1	1	1	1	1	1	0	1	1	3	3	3.33	7	5	2	1	2	2	2	1	1	1	2	0
1	2	3	4	1	1	1	1	0	1	1	0	1	0	2	3.5	3.33	7	8	1	2	3	1	2	2	1	1	1	0
2	2	1	2	1	1	0	1	0	1	1	1	1	1	3	1.5	2.67	9	2	1	2	1	2	1	1	1	1	1	0
2	2	1	4	1	1	1	1	0	0	1	0	1	1	2	3	3	10	6	2	2	2	3	2	2	2	1	1	0
1	2	1	2	1	0	1	1	1	0	0	0	1	0	2	3.5	3.67	8	3	2	2	3	2	3	1	1	1	2	0
1	1	1	4	1	0	1	1	0	1	0	0	1	0	2	2.5	3.17	8	4	2	1	1	2	2	2	1	1	2	1
1	1	1	1	1	0	1	1	0	0	1	1	1	1	2	2.5	2.67	9	4	3	1	1	1	1	1	1	1	1	0
4	4	4	2	1	1	1	1	0	0	1	0	0	1	2	1.5	1.33	10	2	2	1	2	2	2	1	1	1	1	0
2	2	3	1	1	1	1	1	1	1	1	0	1	0	3	3	3.17	9	6	2	2	1	1	1	1	1	1	1	0
4	4	3	4	1	1	1	1	0	1	1	0	1	0	2	3	2.17	8	3	1	1	2	3	2	1	2	1	1	0
2	2	3	5	0	0	0	1	0	1	1	0	1	0	2	2.5	1.67	9	2	4	1	1	2	1	2	1	1	1	1
3	3	3	4	1	1	1	1	0	0	1	1	0	0	2	4	2.67	10	4	2	1	2	2	2	1	2	1	2	0
2	2	2	5	1	0	1	0	0	0	1	0	1	0	2	1.5	2.17	10	2	2	1	3	3	2	3	3	1	3	0
2	2	2	5	1	0	0	1	0	1	1	0	1	1	2	2.5	2	8	3	1	2	3	3	2	2	3	1	2	0
2	2	3	4	1	0	0	1	1	1	1	0	1	0	2	3.5	3	9	3	1	1	2	3	3	1	2	1	2	0
1	1	3	5	0	0	0	0	0	0	0	0	0	0	1	2	1.67	8	6	2	1	2	1	2	2	2	1	2	0
2	3	3	2	1	1	0	1	1	1	1	0	1	0	2	2.5	2.33	8	5	1	2	1	2	2	1	2	1	1	0
2	2	3	4	1	0	1	1	0	1	1	0	1	1	2	1.5	2.17	8	4	1	1	2	1	2	2	1	1	1	0
2	4	4	4	1	1	1	1	1	1	1	0	1	0	3	3	2.17	10	4	1	1	2	2	2	2	2	1	1	0
1	2	1	2	1	1	1	1	1	1	1	1	1	0	3	3	3	10	3	2	2	3	2	3	1	1	1	1	0
2	3	3	4	1	1	1	1	0	1	1	0	1	1	3	3	2.5	8	4	1	1	2	2	2	1	2	1	1	0
1	1	1	5	1	1	1	1	1	1	1	1	1	1	3	4	3.5	8	7	3	2	3	3	3	3	3	3	3	1
4	4	1	4	1	1	1	1	0	1	1	0	1	0	2	3	2.5	7	5	2	1	2	2	3	1	2	1	1	0
1	1	1	5	1	1	1	1	0	1	1	0	1	1	3	2.5	2.83	8	5	2	1	2	3	2	2	2	1	2	0
1	1	3	2	0	0	1	1	0	0	1	0	0	0	1	1.5	2.5	10	4	2	1	2	2	1	1	1	1	1	0
1	1	1	4	1	1	1	1	1	0	1	1	1	1	3	4	3.67	9	4	1	1	3	3	3	2	1	1	1	0
4	4	1	4	1	1	0	1	0	1	1	0	1	0	2	3	2.5	8	4	1	1	2	3	2	2	2	2	2	0
2	4	4	4	1	1	1	1	1	1	1	1	1	1	3	2.5	2.5	9	4	1	2	2	2	3	2	3	1	2	0
2	2	2	4	1	1	1	1	1	1	1	0	1	1	3	2.5	3.17	9	4	1	1	3	3	3	2	2	2	2	0
1	4	1	5	1	1	1	1	0	1	1	0	1	1	3	3	2.83	9	5	1	1	3	1	2	2	3	2	2	0
1	2	1	4	1	1	1	1	1	1	1	0	1	0	3	3.5	1.83	9	3	2	2	2	2	1	1	2	1	1	0
1	1	1	2	1	1	1	1	1	0	1	0	1	1	3	3.5	3.5	9	6	1	2	2	2	3	2	2	1	1	0
1	2	2	4	1	1	1	1	0	1	1	0	1	0	2	3.5	1.83	9	3	2	2	2	2	1	1	2	1	1	0
